# Supplementary material
Source: PubMed Central journal article supplement (PMC3162646)
Supplement: Supp_Data.pdf [file Supp_Data.pdf]

## Supplementary Data

SUPPLEMENTARY TABLE S1. LIST OF PRIMERS USED  
TO AMPLIFY SELECTED EXONS OF BRAF AND RAF ISOFORMS  
FOR SEQUENCING

---

|                |                        |
|----------------|------------------------|
| H-ras exon 1 F | CTAAGTGTGCTTCTCATTGG   |
| H-ras exon 1 R | CATTTACCCATGACCACTGC   |
| H-ras exon 2 F | AAGCCGTGTTGTTTTGCAGG   |
| H-ras exon 2 R | GGTGGCTCACCTGTACTGAT   |
| K-ras exon 1 F | GTAAGGCCTGCTGAAAATG    |
| K-ras exon 1 R | TCCTTTACAAGCGCACGC     |
| K-ras exon 2 F | ATCCAGACTGTGTTTCTCC    |
| K-ras exon 2 R | GCTATCATTACTTCACATGC   |
| N-ras exon 1 F | TTGCTGCTTTTCTACAGG     |
| N-ras exon 1 R | CCAAAGTGAGGATAAGGG     |
| N-ras exon 2 F | CCTCCTCACTCTTTCATATTCC |
| N-ras exon 2 R | CAGAAAATATCCCCAGTACC   |
| Braf exon 11 F | GGCAGGTCAATATAGTTAGC   |
| Braf exon 11 R | CGTGTTATACATACCATGTCC  |
| Braf exon 15 F | CAAAATGCTTTCTCTAATAGG  |
| Braf exon 15 R | TAAGCAGTCACTAGTTTAGG   |

---
